1 **Full title: Co-production of an online research and resource**  
2 **platform for improving the health of young people - The HYPE**  
3 **Project.**

4 Short title: Involving young people in research and resource  
5 development,

6 Cerisse Gunasinghe<sup>1</sup> [ORCID: 0000-0001-9498-2022], Nicol Bergou<sup>1</sup> [ORCID: 0000-0002-  
7 2408-1226], Shirlee MacCrimmon<sup>1</sup> [ORCID: 0000-0002-0503-8679], Rebecca Rhead<sup>1</sup>  
8 [ORCID: 0000-0002-5863-604X], Charlotte Woodhead<sup>1,2</sup>[ORCID: 0000-0002-5545-6238],  
9 Jessica D. Jones Nielsen<sup>3</sup> [ORCID: 0000-0001-6874-1268] & Stephani L Hatch [ORCID:  
10 0000-0001-9103-2427]<sup>1,2</sup>

11 <sup>1</sup>Institute of Psychiatry, Psychology and Neuroscience, King's College London, (Department  
12 of Psychological Medicine), Denmark Hill, (London), UK

13 <sup>2</sup>Institute of Psychiatry, Psychology and Neuroscience, King's College London, (Economic  
14 and Social Research Council (ESRC) Centre for Society and Mental Health), Denmark Hill,  
15 (London), UK

16 <sup>3</sup>City, University of London, School of Arts and Social Sciences, (Department of Psychology),  
17 Clerkenwell, (London), UK

18 Corresponding Author: Dr Cerisse Gunasinghe.

19 Address: Department of Psychological Medicine, Institute of Psychiatry, Psychology and  
20 Neuroscience, King's College London, London, SE5 8AF

21 Phone: 0207 848 0462

22 Email: [cerisse.gunasinghe@kcl.ac.uk](mailto:cerisse.gunasinghe@kcl.ac.uk)

23 Institutional URL: <https://www.kcl.ac.uk/>

24 **NOTE: This preprint reports new research that has not been certified by peer review and should not be used to guide clinical practice.**

## 25 **Abstract**

26           Mental health conditions tend to go unrecognised and untreated in adolescence, and  
27 therefore it is crucial to improve the health and social outcomes for these individuals through age  
28 and culturally appropriate interventions. This paper aims firstly to describe the development and  
29 implementation of the HYPE project platform (a research and resource platform co-designed and co-  
30 produced with young people). The second aim is to describe the characteristics of participants who  
31 engaged with the platform and an embedded pilot online survey.

32 A mixed methods design (including focus groups and repeated measures surveys) was used to address  
33 aims of the HYPE project. Data were analysed using thematic analysis and descriptive statistics to: (1)  
34 help improve access to health and social services, (2) guide provision of information of online  
35 resources and (3) deliver complementary community-based events/activities to promote mental  
36 health and to ultimately prevent mental health issues.

37 Pilot and main phases of the HYPE project demonstrated the capacity and feasibility for such a  
38 platform to reach local, national, and international populations. Analyses demonstrated that the  
39 platform was particularly relevant for young females with pre-existing health difficulties. Some of  
40 the barriers to involving young people in research and help-seeking are discussed.

## 41 **Introduction**

42           The transition period from late childhood to early adulthood is a particularly critical period of  
43 development where the early age of onset of mental health conditions (e.g., depression, anxiety, and  
44 eating disorders) along with the prevalence, chronicity and comorbidity with long-term persistent  
45 and/or recurrent physical health conditions can set the trajectory for an individual's physical and  
46 mental health in adult life (1–9). Further, as many as one in ten 10-24-year-olds have a disability that  
47 affects their ability to do daily activities (8). Findings from longitudinal cohort studies have consistently  
48 shown associations between childhood mental health and poorer mental health in later years (10–  
49 12). Chronic physical health illnesses have a profound impact on the mental well-being of children as  
50 young as seven years old (13) and put them at increased risk for developing mental health issues into  
51 early adulthood (14). Research demonstrates the importance of identifying and intervening in  
52 comorbid physical and mental health at earlier stages of the life course to prevent negative health and  
53 social outcomes.

54 While social determinants of health are well documented (15–20), including for children and young  
55 people in the UK (21–23), those from socioeconomic disadvantaged backgrounds continue to  
56 experience poorer health outcomes (24,25). For example, there is growing concern about the increase  
57 in obesity amongst young people from socially deprived backgrounds, which are associated with other  
58 physical health conditions (26) and poor mental health (27). Regarding other social domains, findings  
59 from the South East London Community Health study (28,29) indicate that compared to older age  
60 groups, young people had a greater likelihood for poly substance use (30), being exposed to violence  
61 (31) and having the highest proportion of debt (32). Additionally, exposure to violence and experience  
62 of financial debt amongst this group were associated with an increased risk of poor mental health  
63 outcomes (31,32). Integrated health and social care for this young people (32) that is age and culturally  
64 appropriate (32, 33) is critically needed to improve mental health outcomes. Woodhead et al (2022)  
65 highlight the gaps in research, evidence-base, and service development especially in view of high

66 prevalence and incidence of social welfare legal difficulties (19,21,33) Furthermore, there is increasing  
67 acknowledgement for such integration with, and across health disciplines given the interface between  
68 physical and mental health (34,35). However, we need to better understand which social determinants  
69 are particularly relevant in late adolescence and early adulthood to tailor resources and improve  
70 existing health and social care services and service use.

71 In response, we developed the HYPE (improving the Health of Young People) project, described in this  
72 paper, which is an online research and resource platform for an ethnically and socioeconomically  
73 heterogenous sample of young people (aged 16 years and over). The HYPE project aims to better  
74 understand and address the health and social needs of this population through the facilitation of  
75 young people's involvement in research; assessment of current social, economic and health  
76 experiences of young people; and increase input and access to online and community-based health  
77 and social welfare resources and interventions (including clinical research studies). Secondary aims of  
78 the project are to pilot, evaluate and assess the feasibility of young people's experience of the HYPE  
79 project as well as previous use of health and social care services or programmes. Using this approach,  
80 also it will be possible to create a research resource of e-community members who can self-refer or  
81 consent to be re-contacted regarding participation in future research studies.

82 Development and implementation of the HYPE project was guided by the work of van Germert-Pijnen  
83 et al (2011), who proposed five key aspects in optimising the engagement of the target population in  
84 online/web-based health interventions and resources (36). Furthermore, the Conceptual Framework  
85 of Access to Healthcare as proposed by Levesque et al. (2013) offers some important insights into  
86 indicators that improve health service use (37,38). For young people accessing and engaging with  
87 health and social welfare services, the culture of care has been largely insensitive to this group. In a  
88 scoping review, Woodhead et al (2022) highlighted studies that showed low rates of help-seeking  
89 amongst young people experiencing social welfare difficulties, though they more frequently reported  
90 wishing they had sought advice (35). This raises significant concern as such support and resources are

91 necessary to help alleviate mental and physical health difficulties and help prevent relapse in long-  
92 term conditions (35). Obstacles to accessing support are particularly pertinent for historically  
93 marginalised and socioeconomically disadvantaged young people who are most at risk of health  
94 inequalities (39).

95 This project was proposed as it is widely known that internet use has dramatically increased over  
96 recent years, particularly the access and contribution to social media platforms by young people,  
97 (40,41). Therefore, digital technology and e-health interventions have potential to address the issues  
98 of young people's lower rates of health and social welfare service use. However, researchers have  
99 highlighted the need to further develop digital health interventions for young people that are sensitive  
100 and culturally specific to the needs of this group (42,43). It is important to examine how young people  
101 engage with health promotion and education via such methods, given the complex health and social  
102 welfare needs of this population as well gaining insight into how to improve access to resources for  
103 this population (35).

104 This protocol paper aims to describe the development and implementation of the HYPE project  
105 platform. Our intention here is to transparently document the processes and progress throughout the  
106 HYPE project to help others see the benefits of embedding participatory and co-design approaches  
107 when conducting similar work. The second aim is to describe the characteristics of participants who  
108 engaged with this type of online pilot research survey and associated resource platform.

## 109 Qualitative study questions

110 To identify barriers to health and social welfare resources and services the following questions  
111 were explored:

- 112 1. What are the challenges and health concerns that are important for young people aged 16  
113 years and over?

- 114 2. How to develop and provide resources that would be acceptable and appropriate for young  
115 people aged 16 and over?

## 116 Hypothesis (for quantitative data analyses)

117 Young people who engage in the HYPE project are more likely to report moderate to severe  
118 mental and physical health symptoms.

## 119 **Materials and Methods**

### 120 Design

121 To address key objectives, the HYPE project, co-designed with the HYPE project stakeholder  
122 and advisory groups, is a web-based research and resource platform for young people (aged 16 years  
123 and over) living in England. The platform provides a health and social welfare resource directory  
124 containing information about online and community-based health and social welfare resources as well  
125 as interventions (including clinical trials). The platform also hosts an online pilot survey to assess the  
126 health as well as formal (e.g., National Health Service (NHS)) and informal (e.g., community  
127 organisation) health service use and support for those who consent to participate.

128 Mixed-methods data from in-person advisory group meetings, online focus groups and repeated  
129 measures surveys supported clinically informed decisions to guide resource development. Analysis of  
130 these data served to; help improve access to health and social services, guide provision of information  
131 of online resources and deliver complementary community-based events/activities to promote health  
132 and well-being of the target population.

## 133 Ethical approval

134           The HYPE project received ethical approval from the King's College London (KCL) Psychiatry,  
135 Nursing and Midwifery Research Ethics Committee for non-clinical research populations (Reference  
136 Number:HR-17/18-7535).

## 137 Setting

138           The HYPE project research team are based at the Institute of Psychiatry, Psychology &  
139 Neuroscience (IoPPN), KCL, (London, UK). London is notable for being the home of one of the largest  
140 ethnically and racially diverse communities than other parts of England (44). The London borough  
141 where the IoPPN is based, is characterised by a high population density and higher socio-economic  
142 deprivation than the country's average (28). The location of the study enables an established  
143 partnership between the IoPPN and local mental and physical health services (King's Health Partners)  
144 as well as strong established links to community organisations through the Health Inequalities  
145 Research Network ([HERON](#)). HERON is a research and public engagement network comprising  
146 community members and organisations, researchers and healthcare practitioners. Focussing on  
147 mental health and the interface between mental and physical health, HERON aims to raise critical  
148 awareness of, help people share experiences about, and identify ways to reduce inequalities in health  
149 and healthcare. This enables acquired knowledge through this project to have translational value as  
150 well as direct benefit for patients and the public.

## 151 Participants

152           This section provides an overview of the recruitment strategies implemented to invite young  
153 people (16 years and over) to: (1) access the platform, (2) participate in the online pilot survey and,  
154 (3) take part in activities (e.g., ways young people could get involved with the project, community-  
155 based programmes, events) (36-38). Following on from this, survey sample and inclusion criteria are  
156 detailed.

157 Recruitment

158 Pilot phase – Release of the HYPE project platform

159 The HYPE project platform (<https://hypekcl.com/>) was launched in November 2018 following  
160 preliminary public and patient engagement and involvement (as outlined below). This marked the  
161 start of the initial pilot phase whereby information about the HYPE project was disseminated to the  
162 wider public. We then undertook an iterative process of initially targeting local gatekeepers in  
163 community organisations working with young people and a purposively selected group of academic  
164 institutions in London, based on existing partnerships or networks including our own HERON Network.  
165 In addition, we regularly updated a social media recruitment campaign with Facebook™, Instagram™  
166 and Twitter™ which was co-created by the research team and members of the HYPE advisory group.  
167 These strategies were in parallel with project adverts being placed within the community (e.g., barber  
168 shops, nail bars, community centres) and charitable organisations that young people frequented as  
169 well as physical and mental health service users. It was important for the research team to spend time  
170 ensuring broad outreach and relationship building with these organisations and young people  
171 themselves. Those who consented to be re-contacted, were invited to take part in follow-up surveys  
172 and/or one-to-one face-to-face or telephone interviews.

173 Main phase of the HYPE project following revisions to the HYPE project platform

174 Regular audit of survey responses during the pilot illustrated an overrepresentation of females  
175 and individuals of white British ethnic background. Consequently, with the aim of collating survey  
176 responses from a more diverse and representative sample, recruitment strategies were modified for  
177 the main phase of the project (October 2019 - January 2021). These strategies included linking with  
178 racial and ethnic minority social media influencers together with advertising in a local newspaper,  
179 religious places of worship, gyms and sport centres/events. In addition, design of social media adverts  
180 was tailored to young men and people from racial and ethnic minority backgrounds to encourage the  
181 ethos of our approach, “Take part and have your voices heard”. Recruitment methods were also scaled



182 up nationally which included study adverts being disseminated by McPin Foundation (a mental health  
183 research charity) and MQ (an organisation supporting mental health research). Following the onset of  
184 the pandemic, recruitment strategies were largely restricted to online or remote activities. The  
185 research team delivered remote presentations to young people service user groups, created a video  
186 advertisement for YouTube™ and continued with social media campaigns, which were further  
187 impacted by the implementation of stricter guidelines for advertising via social media platforms.  
188 Placement of printed project adverts at community centres and in person meetings, engagement and  
189 outreach activities were suspended to comply with social distancing and lockdown measures following  
190 the outbreak of COVID-19 in March 2020.

191 Survey sample and inclusion criteria

192 A convenience sample to date includes 540 individuals from 1223 initial sign-ups, who  
193 consented to take part and provided responses to the online survey. Participants were eligible if they  
194 self-identified as a young person (aged 16 years and over) and residing in the UK.

195 Materials

196 In-person user testing and consultation with the HYPE advisory group lasted a maximum of  
197 two hours where facilitators took notes of members' responses. Online focus groups (maximum of 90  
198 minutes each) were recorded with consent.

199 Topic guide for qualitative data collection

200 Topic guides for the focus groups (advisory and user-testing groups) were semi-structured. They  
201 included questions relating to 1) how to improve the platform design and user interface; 2) how to  
202 engage and retain young people's involvement in co-production, completion of the survey and use of  
203 the resources; and 3) how to develop and provide resources that would be acceptable and appropriate  
204 for young people. Topic guides were further refined depending on the stage of project and platform  
205 development (see supplement for example interview questions).

206 Development of a pilot online survey

207 The HYPE project advisory group and stakeholder group developed topics for the online survey  
208 through a process of consensus building. These topics for the survey included: (1) socio-demographics  
209 and migration; (2) education (3) mental health symptoms, physical health symptoms and long-  
210 standing health conditions; (4) socioeconomic status and work-related behaviour; (5) psychosocial  
211 factors (e.g., adverse life events, social support, self-esteem, discrimination, neighbourhood  
212 characteristics); (6) addictions and substance use; and (7) health service use.

213 At follow-up (6 and 12 months), questions were repeated to assess physical and mental health  
214 outcomes; psychosocial factors (e.g., adverse life events, social networking, self-esteem, physical  
215 activity) and coping strategies. Follow-up surveys also included evaluation (data and analysis outside  
216 the scope of this paper) items relating to participants' experience of using the HYPE project platform  
217 and use of health services. The relevant mental health and physical health measures for the scope of  
218 this paper are outlined below. A full list of measures included in the survey can be accessed from the  
219 corresponding author.

220 Health outcomes

221 Presence of depression and anxiety symptoms in the most recent two weeks, were assessed  
222 using the well-validated *Patient Health Questionnaire (PHQ-9)* (45) and *Generalised Anxiety Disorder-*  
223 *7 (GAD-7)* (46,47). Both measures are commonly used in primary and secondary care to detect  
224 criterion symptoms for depression and/or anxiety and generalised anxiety disorder respectively.  
225 Moderate to severe depression or anxiety were indicated where total scores are 10 or above.

226 *Patient Health Questionnaire-15*. Participants self-reported current severity of 15 somatic experiences  
227 that are understood to be among the most common somatic symptoms by answering "During the past  
228 4 weeks (28 days), how much have you been bothered by any of the following problems?" Total scores  
229 of 10 or above indicate moderate-severe symptom severity (48).

230 *Long-standing illness.* Self-reported long-standing health problems, illness or disability by answering  
231 Yes or No) to the question “Do you have any long-standing health problems, illness or disability?”

232 Processes and procedure

233 Here, we first describe public and young people’s engagement and involvement activities that  
234 supported the development and later implementation of the HYPE project platform. In doing so we  
235 illustrate how we considered previous literature relating to improving health service uptake (36-38)  
236 and more specifically digital health interventions (36,42). These activities were also guided by the  
237 National Co-ordinating Centre for Public Engagement (49) and the National Institute for Health and  
238 Care Research (NIHR) recommendations for public involvement in research (<https://www.invo.org.uk/>  
239 now NIHR Centre for Engagement and Dissemination (50).

240 Public and Patient Engagement and Involvement

241 Establishing the HYPE stakeholder and advisory groups

242 Six months prior to the platform launch (see Figure 1), we carried out 50 in-person  
243 consultations with multidisciplinary specialist clinical academics, healthcare providers and  
244 intervention specialists (the HYPE stakeholder group), working with young people and/or digital health  
245 interventions. Individuals and organisations were either known to, or identified by, the research team  
246 (36-38,42). These discussions guided the website design, survey content and digital health and social  
247 welfare directory development (36-38,42).

248 In addition, the HYPE project advisory group was formed which included school/college and  
249 undergraduate students, health service users and young people who had previously attended HERON  
250 engagement and outreach activities. This advisory group was diverse in relation to age, gender,  
251 ethnicity, and race. HYPE project advisory group members were reimbursed with a £15 shopping  
252 voucher (in addition to reimbursement of travel expenses if applicable) for their time and contribution  
253 in subsequent user-testing focus groups (50).

254 User-testing and consultation prior to piloting the HYPE project platform

255           Following on from establishing the HYPE stakeholder and advisory groups, over two in-person  
256 user-testing sessions, the HYPE project advisory group members provided feedback and made  
257 suggestions about intended project procedures. One example of the importance of this engagement  
258 process was feedback the research team received in response to the question about providing a  
259 biological (saliva) sample for scientific research (e.g., “What are your thoughts about genetic/DNA  
260 samples and this type of research?”). Further discussion led to a member of the group asking, “Do I  
261 get the results from my sample?” This prompted a discussion of the differences between a clinical  
262 blood sample, a research DNA sample and the conditions which participants would be asked to go to  
263 their GP for further diagnostic tests. The group said they (and others) would like to have this  
264 information available to them and to be informed of what studies used their samples for research in  
265 future. This feedback guided the development of our project information sheet and information  
266 provided via the online platform (“Frequently Asked Questions”).

267 The research team also met with another local young people’s mental health advisory group  
268 associated with a local health service to discuss the final draft of the research survey and how we  
269 might increase engagement with all aspects of the HYPE project platform. Responses from stakeholder  
270 and advisory groups were collated and changes to the project and platform were implemented prior  
271 to the platform launch and recruitment (as detailed above).

272 User-testing and consultation during pilot and main phase of the HYPE project

273           After a six-month pilot phase, we held two further user testing sessions in May 2019. We  
274 invited the HYPE advisory group as well as HYPE project participants (the HYPE community) who had  
275 consented to be recontacted to take part in an initial evaluation of the project progress to date. In  
276 February 2020 we held an online focus group with the HYPE project advisory group and provided a  
277 progress update and requested feedback on topics discussed (like previous advisory and user-testing

278 sessions detailed above). This gave young people who were not able to travel to an in-person meeting,  
279 an opportunity to be involved and contribute to the project development.

280 In April 2020, following the onset of the COVID-19 pandemic, we held online focus groups (in  
281 compliance with King’s College London research ethics and national lockdown measures) with HYPE  
282 community members/participants as well as individuals who expressed interest in taking part in the  
283 group via email or a social media campaign. Feedback helped guide development of a follow-up survey  
284 to understand the needs of young people during the pandemic and to help tailor resources to support  
285 them. Suggested resources were added to the health and social welfare resource directory listed on  
286 the HYPE project website and were updated and refined based on survey responses. COVID-19 specific  
287 resources, ‘Things to do while at home’, information relating to the Black Lives Matter movement and  
288 resources for LGBTQ+ young people were created as separate additional features of the HYPE project  
289 platform. Figure 1 illustrates the stages of public and patient engagement and involvement  
290 undertaken by the research team.

291 **Fig 1. Flow chart illustrating process of public and patient engagement and involvement**

292

293 The following sections describe the procedure, processes and activities that the research team  
294 completed in order to facilitate the survey component of the project.

295 Procedure

296 Study adverts and presentation materials invited potential participants to visit the HYPE  
297 project platform (<https://hypekcl.com/>) where they could read a summary of the research project  
298 objectives on the home page. If they were interested in taking part in the online research survey, they  
299 were asked to click the ‘Sign-up’ button. The individual would then be directed to the sign-up page  
300 where a hyperlink to the participant information sheet (PIS) and easy read PIS were provided, and  
301 they were asked to read the PIS and enter their contact email address if still interested in taking part.  
302 On receipt of an automated alert email, a member of the research team would email the potential

303 participant with a hyperlink to the PIS with a reminder to re-read the information attached (if not  
304 already done so), and a unique link where their electronic consent form and their survey responses  
305 were recorded. The consent form and survey were accessed via Qualtrics® (a web-based survey tool).  
306 At follow-up (at 6 and 12 months), similarly a unique survey link was sent to participants who agreed  
307 to be recontacted.

### 308 Project oversight

309 To implement revisions and update the HYPE project platform where appropriate, the  
310 research team reviewed progress of the project and obstacles to the delivery in weekly team meetings.

### 311 Development of Risk Protocols

312 At the start of the project, the research team discussed possible ways to support to young  
313 people who reported self-harm or suicidal intent when completing the Patient Health Questionnaire  
314 9-item depression scale (45) as part of the online survey and developed a risk protocol (see  
315 supplementary). In line with ethical considerations foremost and the project aims to increase access  
316 and reduce barriers to resources, it was decided that rapid response to participants' survey response  
317 (if greater than 0) was important and that our duty of care was to signpost the individual to  
318 appropriate emergency services. We also wanted to test the feasibility of offering and providing an  
319 opportunity to speak with a clinical member of the research team to ensure the safety of the  
320 participant. If the participant requested to speak to a clinical member of the research team, a mutually  
321 convenient time and mode of contact was arranged with the participant. Participants were also able  
322 to use the HYPE Project website to request contact (email/telephone call) from a member of the  
323 research team if they required further support.

### 324 Amendments to survey protocol

325 Based on the HYPE Project advisory group feedback following the pilot phase, a monthly prize  
326 draw to receive one of three £10 shopping vouchers was introduced into the main study for  
327 participants who completed the survey. In addition, postal code was added to both the baseline and

328 follow-up survey to enable the research team to identify locally relevant data on health and social  
329 need, as well as to inform the development and tailoring of our online and community-based  
330 resources. By providing the first section of a person's postcode, we were able to identify districts and  
331 areas where participants were living without compromising their privacy by specifying potential street  
332 names or numbers. We also added an item asking the participant where they received information  
333 about the project which enabled us to understand which recruitment activities were most effective  
334 which would help inform future research project development and guide other researchers in their  
335 work.

## 336 Analyses

### 337 Quantitative data

338 Completion of the survey was limited to residents of UK to comply with terms of funding and  
339 those over 16 years due to the scope of the project, despite the online platform/website being  
340 available to international users of all ages. Google Analytics supported analysis to identify who  
341 engaged with this type of survey and resource platform. Google Analytics does not track users under  
342 18 years old, thus they are excluded from these analyses. Descriptive analyses were conducted using  
343 survey data to examine the characteristics of young people who completed the online survey during  
344 the pilot/main-project launch. Unweighted frequencies and percentages were calculated for  
345 participant socio-demographic characteristics (age, gender, ethnicity, country of birth, highest  
346 qualification, employment, and benefit status) and health measures (PHQ-9, GAD-7, PHQ-15, and  
347 presence of long-standing illness). Analyses were conducted using STATA 15 (51).

### 348 Qualitative data

349 User-testing and consultation group data (notes) were analysed using framework approach  
350 (52). Recorded online focus groups were transcribed verbatim, analysed and coded thematically using  
351 an inductive approach (53).

## 352 Results

353 Platform users

354 According to Google Analytics, during the main phase of the study (October 2019 – June 2020)  
355 there were almost 9,000 visits to sections of the HYPE project online platform (see Figure 2 for  
356 geographical representation). It is estimated that these rates would be doubled or more if data were  
357 available for those under 18 years.

358 **Fig 2. Map illustrating engagement and geographical location of HYPE e-community**  
359 **members/participants.**

360

361 As illustrated in the graph (see Figure 3 for snapshot of audit conducted in January 2020), spikes in  
362 accessing the platform were following targeted engagement strategies via social media campaigns  
363 and adaptations to the platform based on feedback received from the HYPE Project’s advisory group  
364 members. There were 15,284 page views in total. The majority (60%, n = 3964) of users were in the  
365 UK, followed by the USA (19%, n = 1274). The two most used web browsers were Chrome (43%) and  
366 Safari (31%). The most common mobile phone operating systems used was iOS (61%) followed by  
367 Android (38%).

368 **Fig 3. Graph illustrating website users during January 2020**

369

370 Survey participants

371 Of those who expressed interest in taking part by providing their email address on the (n=  
372 1223), 540 (44.1%) young people participated in the survey. Within the target population of 16–24-  
373 year-olds (n=433), most of the sample were female (86.8%, n=376), aged 16-17 years (65.4%, n=283)  
374 and White British (63.3%, n=274). 272 (62.8%) reported being unemployed and 123 (28.4%)  
375 participants were receiving benefits. Within this sample population, as shown in Table 1, 55.7%  
376 (n=241) met criteria for moderate to severe depression, 60.1% (260) for moderate-severe somatic



377 symptoms, 47.6% (206) for moderate-severe anxiety and 70.0% (303) had at least one long-standing  
 378 illness.

379 **Table 1. Sample characteristics and proportions of those aged 16-24 years and residing in England**  
 380 **who completed the pilot online survey (N=433).**

|                                 | <b>(N=433)</b> |      |
|---------------------------------|----------------|------|
|                                 | n              | %    |
| <b>Gender</b>                   |                |      |
| Male                            | 44             | 10.2 |
| Female                          | 376            | 86.8 |
| Other                           | 13             | 3.0  |
| <b>Sexual orientation</b>       |                |      |
| Heterosexual                    | 241            | 55.7 |
| Gay/Lesbian                     | 33             | 7.6  |
| Bisexual                        | 117            | 27.0 |
| Other                           | 22             | 5.1  |
| Prefer not to say               | 20             | 4.6  |
| <b>Age</b>                      |                |      |
| Under 18                        | 283            | 65.4 |
| 18-24                           | 150            | 34.6 |
| <b>Ethnicity</b>                |                |      |
| White British                   | 274            | 63.3 |
| White Other                     | 31             | 7.2  |
| Black African/Black Caribbean   | 38             | 8.8  |
| Asian                           | 58             | 13.4 |
| Mixed/Other                     | 32             | 7.3  |
| <b>Country of birth</b>         |                |      |
| Not Born in UK                  | 55             | 12.7 |
| Born in UK                      | 378            | 87.3 |
| <b>Education level</b>          |                |      |
| No qualification/Less than GCSE | 36             | 8.3  |
| GCSE or equivalent              | 240            | 55.4 |
| A level                         | 111            | 25.6 |
| Degree or above                 | 45             | 10.4 |
| <b>Employment status</b>        |                |      |
| Unemployed                      | 272            | 62.8 |
| Employed                        | 161            | 37.2 |
| <b>Benefit receipt</b>          |                |      |
| No benefit received             | 310            | 71.6 |
| Benefit received                | 123            | 28.4 |
| <b>Health</b>                   |                |      |
| PHQ-9 <sup>a</sup>              | 241            | 55.7 |
| PHQ-15 <sup>b</sup>             | 260            | 60.1 |
| GAD-7 <sup>c</sup>              | 206            | 47.6 |

|                                   |     |      |
|-----------------------------------|-----|------|
| Longstanding illness <sup>d</sup> | 303 | 70.0 |
|-----------------------------------|-----|------|

381 \* *Frequencies are unweighted and may not add up due to missing values.*

382 <sup>a</sup> Participants with total scores of 10 and above on PHQ-9 indicating moderate to severe depression.

383 <sup>b</sup> Participants with total scores of 10 and above on GAD-7 indicating moderate to severe anxiety.

384 <sup>c</sup> Participants with total score of 10 and above on PHQ-15 indicating moderate to severe level of  
385 severity.

386 <sup>d</sup> Participants with a longstanding illness.

387

## 388 Resources

389 We endeavoured to provide evidence-based resources, where organisations provided clear  
390 statements of efficacy and safeguarding, that were free and could be accessed online or by telephone.

391 The HYPE project platform also provided information about online or community-based activities and  
392 events as well as ways young people could get involved with the project (e.g., joining the HYPE advisory  
393 group, becoming a HYPE ambassador, contribute to a blog or podcast for the Beyond the HYPE series)  
394 and other ethically approved research studies. All resources were free to access regardless of whether  
395 individuals completed the survey.

396 Some examples of the feedback received from the HYPE advisory groups were that individuals wanted  
397 more resources for those with eating disorders, dealing with difficult life events and information about  
398 the links between physical activity and mental-physical health. User-testing sessions also informed the  
399 research team that young people have preferences for both online and in-person workshops on a  
400 range of topics relevant to young people, which could also be developed based on the health and  
401 social welfare needs identified by the survey results.

402 The research team were able to co-create blogs and podcasts with young people that were included  
403 as resources on the platform and disseminated to the public more widely. The series presented  
404 discussion around topics that were of interest and importance to young people who attended HERON  
405 outreach programmes, and by HYPE platform survey, the HYPE advisory group and online focus group  
406 responses. The topics included the link between physical exercise and health, social welfare issues,  
407 discrimination and health inequalities (<https://hypekcl.com/podcast/>).

408 Multiple local and national researchers requested their studies to be advertised on the HYPE project  
409 platform (<https://hypekcl.com/research/take-part-in-research/>). This enabled the research team to  
410 signpost young people and gatekeepers working with this population to relevant research to  
411 opportunities for involvement in research as well as providing information of research findings.

## 412 **Discussion**

413 The first aim of this paper was to describe why and how the HYPE project was created as an  
414 online research and resource platform for young adults aged 16 years and older. It is well documented  
415 that without adequate support or intervention, health and social adversity during mid-late  
416 adolescence and early adulthood can have lasting and long-term harmful consequences for individuals  
417 (2, 3, 4, 17). As suggested by van Germert-Pijnen et al (2011) (36), implementing a co-design and co-  
418 production framework with multidisciplinary stakeholders and young people alongside mixed-  
419 methods data (user-testing focus groups and surveys) assisted in gaining better insight and knowledge  
420 of the challenges young people are currently facing. The framework also informed and addressed the  
421 aim to develop the HYPE project platform which provided an opportunity for young people to  
422 participate in research as well as multidisciplinary online and community-based health and social  
423 welfare resources and interventions [34]. Platform users were signposted to resources based on  
424 survey responses as well as those that the advisory and stakeholder group identified as relevant to  
425 the target population.

426 The second aim of presenting this protocol was to describe the characteristics of the convenience  
427 survey sample. For young people who completed the survey, those experiencing socioeconomic  
428 disadvantage (as measured by employment status and benefit receipt) also reported physical and  
429 mental health difficulties. Participants had higher rates of mental and physical health conditions,  
430 assessed through standardised self-report measures, compared to other larger cohort studies of  
431 children and young people within this age group (5,7,8,10,13). These data helped to regularly evaluate  
432 the acceptability and appropriateness of the health and social welfare directory (36-38). Ensuring that

433 resources were free to access was intended to reduce financial barriers to accessing services and  
434 support (37).

435 Despite the assumption that young people being perceived as a ‘hard to reach’ population, there has  
436 been ongoing active and invaluable involvement of young people in the project from its inception.  
437 Moreover, advisory group members and other young people challenged this notion in episodes of the  
438 Beyond the HYPE podcast series (<https://hypekcl.com/podcast/>). Offering young people various ways  
439 to share their experiences contributes to a better understanding why mistrust, stigma, upholding  
440 cultural and/or religious norms as well as frustration with being not heard, were some of the barriers  
441 to engagement. This was in relation to the platform as well as research and health services (particularly  
442 mental health support) more broadly [8, 34].

#### 443 Methodological considerations

444 Due to lessons learned during the pilot phase of the study, subsequent engagement, and  
445 recruitment activities considerably increased participation from racial and ethnic minority groups. We  
446 have made strides in our understanding of inclusive practices and how to improve engagement with  
447 these groups of individuals [34]. For example, holding a continued presence through activities and  
448 social media and preparedness to shift priorities of the project and associated tasks. However, there  
449 remained low engagement by young men, particularly completion of the survey, despite involving and  
450 collaborating with male influencers and organisations specifically working with this population. For  
451 example, a podcast episode was co-created titled ‘Men's Mental Health with 90s Baby Show’ and the  
452 research team attended a community event whereby the organisers invited attendees to take part in  
453 the HYPE project and visit the platform.

454 During the main phase of the project, it was ethically permitted to conduct analysis of the online  
455 platform/website access. This showed that there was considerably greater engagement with the  
456 health and social welfare resource directory, events, and activities, compared to the online research  
457 survey. The research team were also able to improve the user journey relating to consenting to, and

458 completing the online survey, which may have increased the conversion rate from initial sign-up to  
459 consenting to participate in the survey.

460 A minority of participants who reported mild to severe thoughts of self-harm or suicide, requested a  
461 call or further email contact with a study clinician. It is acknowledged that this may have been an  
462 additional time and financial cost with a larger sample, however it was considered an additional  
463 strength of the project to help reduce barriers to seeking support for poor mental health as well as  
464 being able to assist relapse management for those who had pre-existing mental health conditions.

465 Survey fatigue experienced population is likely to have resulted in lower completion rates as it would  
466 appear the need for health and social care resources outweighs desires to contribute to *yet another*  
467 *survey*. For those with interest or conducting work in this area, it is important to consider where there  
468 is a duplication of data being collected and where existing data resources can be utilised (for example  
469 the Key Data series published by the Association for Young People's Health). Another possible reason  
470 for low survey completion rates could be attributed to the positionality of the research team and its  
471 affiliation to formal health services. While on one hand an academic institution maybe perceived as a  
472 source of information, potential survey participants may have experienced fear and/or mistrust in  
473 providing personal information and the implications that may have.

474 Strengths and limitations

475 Facilitating reciprocal relationships was central to this project and of the wider research group  
476 whereby it places young people and the community at the centre. Analyses of mixed-method data has  
477 illustrated that this digital/web-based platform has potential to reach many young people. The  
478 platform in parallel with in-person and community engagement and involvement activities/resources,  
479 enabled the research team to attend to both the needs of the individuals and improve access to  
480 resources for the wider target population. However, analyses suggests that this type of platform and  
481 associated recruitment strategies were more likely to engage individuals with existing experiences of  
482 mental and physical health symptoms and/or conditions.

483 Furthermore, following the onset of the pandemic and national lockdown in the UK in March 2020,  
484 the HYPE Project platform was able to rapidly collect data to inform resources on the platform to  
485 provide ongoing support for young people. For example, having exams cancelled (national curriculum  
486 and those required for higher education institution entrance), disruptions to/uncertainty around  
487 starting higher education, less stable romantic relationships, less stable employment, being confined  
488 with family during a period in which autonomy can be important), as well as other challenges  
489 potentially shared by other age groups (e.g., lack of access to green space, overcrowding, loss of  
490 household income, interpersonal conflict, and food insecurity). While we were able to adapt the  
491 health and social welfare resource directory to reflect the need to be able to remotely access support  
492 and activities, it did mean that our in-person outreach and community activities had to be suspended  
493 which may have resulted later disengagement.

#### 494 Implications and future directions

495 Many young people value a sense of agency over their health and wellness. The HYPE project  
496 platform endeavoured to inform users about multidisciplinary ways to maintain good health and  
497 empower them to make decisions about their help-seeking. With continued evaluation and  
498 adaptation, the platform has the potential to support young people experiencing early signs and  
499 symptoms of poor health, those in need of (and awaiting) formal health and/or social welfare  
500 intervention and supporting relapse prevention in those with existing health conditions.

501 Future work aims to utilise existing data to extend the HYPE online-platform to provide resources that  
502 promote wellbeing in partnerships with existing and new collaborators. For example, we will co-design  
503 a life-skills programme, provide vocational opportunities and tailored resources for underrepresented  
504 and marginalised young adults which will be made widely available for HYPE community members and  
505 the public. To ensure we continue to hear voices of young people, in-depth qualitative studies  
506 designed and conducted by students and early carer researchers are in progress. These are exploring  
507 and evaluating experiences of educational, health and social welfare programmes and what barriers,

508 if any, exist in accessing these resources. Finally, further analyses of platform use, and survey  
509 (including follow-up) data might be able to help further understand patterns of accessing support  
510 either via the platform or other routes. For example, whether people accessing the platform have  
511 accessed support that they might have not got elsewhere or got more easily here, whether the  
512 resources via the platform provided a bridge to other types of help-seeking, and whether those use  
513 the platform are already/active help-seeking rather than those that are not.

## 514 **Acknowledgements**

515 A special thanks to the HYPE project participants, the HYPE project young people’s advisory  
516 and stakeholder groups, our NIHR Maudsley Biomedical Medical Centre Youth Award students, Anna  
517 Simpson, Andrew Boateng, The HYPE project research team, Esther Tolani and Paul McCambridge,  
518 who have provided guidance in the development and supported the implementation of this platform.

## 519 **References**

- 520 1. Shakoor S, Jaffee SR, Bowes L, Ouellet-Morin I, Andreou P, Happé F, et al. A prospective  
521 longitudinal study of children’s theory of mind and adolescent involvement in bullying:  
522 Theory of mind and adolescent involvement in bullying. *Journal of Child Psychology and*  
523 *Psychiatry*. 2012 Mar;53(3):254–61.
- 524 2. Ahn JV, Sera F, Cummins S, Flouri E. Associations between objectively measured physical  
525 activity and later mental health outcomes in children: findings from the UK Millennium  
526 Cohort Study. *J Epidemiol Community Health*. 2018 Feb 1;72(2):94.
- 527 3. Sullivan A, Parsons S, Wiggins R, Heath A, Green F. Social origins, school type and higher  
528 education destinations. *Oxford Review of Education*. 2014 Nov 2;40(6):739–63.
- 529 4. Wolfe I. Disproportionate disadvantage of the young: Britain, the Unicef report on child well-  
530 being, and political choices. *Archives of Disease in Childhood*. 2014 Jan 1;99(1):6–9.
- 531 5. Hagell A, Shah R. Key Data on Young People 2019: Latest information and statistics.  
532 Association for Young People’s Health. 2019; Available from: [www.ayph.org.uk](http://www.ayph.org.uk)

- 533 6. Powell A. NEET: Young people Not in Education, Employment or Training. 2021; Available  
534 from: <https://researchbriefings.files.parliament.uk/documents/SN06705/SN06705.pdf>
- 535 7. Hagell A, Wortley L, Ross L, Whitaker E. Key Data on Young People 2021. 2021; Available  
536 from: [www.ayph.org.uk](http://www.ayph.org.uk)
- 537 8. Hagell A, Shah R, Coleman J. Key Data on Young People 2017. 2017; Available from:  
538 [www.ayph.org.uk](http://www.ayph.org.uk)
- 539 9. The Prince's Trust Natwest Youth Index 2022. 2022; Available from: [https://www.princes-](https://www.princes-trust.org.uk/Document_YouthIndex2022.pdf)  
540 [trust.org.uk/Document\\_YouthIndex2022.pdf](https://www.princes-trust.org.uk/Document_YouthIndex2022.pdf)
- 541 10. Sellers R, Warne N, Pickles A, Maughan B, Thapar A, Collishaw S. Cross-cohort change in  
542 adolescent outcomes for children with mental health problems. *J Child Psychol Psychiatr.*  
543 2019 Jul;60(7):813–21.
- 544 11. Kim-Cohen J, Caspi A, Moffitt TE, Harrington H, Milne BJ, Poulton R. Prior Juvenile Diagnoses  
545 in Adults with Mental Disorder: Developmental Follow-Back of a Prospective-Longitudinal  
546 Cohort. *Arch Gen Psychiatry.* 2003 Jul 1;60(7):709.
- 547 12. Centre for Longitudinal Studies. 2017; Available from: [https://cls.ucl.ac.uk/wp-](https://cls.ucl.ac.uk/wp-content/uploads/2017/08/UCL_MentalHealth_Brief_WEB.pdf)  
548 [content/uploads/2017/08/UCL\\_MentalHealth\\_Brief\\_WEB.pdf](https://cls.ucl.ac.uk/wp-content/uploads/2017/08/UCL_MentalHealth_Brief_WEB.pdf)
- 549 13. Hysing M, Elgen I, Gillberg C, Lie SA, Lundervold AJ. Chronic physical illness and mental  
550 health in children. Results from a large-scale population study. *J Child Psychol & Psychiat.*  
551 2007 Aug;48(8):785–92.
- 552 14. de Ridder D, Geenen R, Kuijjer R, van Middendorp H. Psychological adjustment to chronic  
553 disease. *The Lancet.* 2008 Jul;372(9634):246–55.
- 554 15. Marmot MG, Stansfeld S, Patel C, North F, Head J, White I, et al. Health inequalities among  
555 British civil servants: the Whitehall II study. *The Lancet.* 1991 Jun;337(8754):1387–93.
- 556 16. Kalonda A, Kwenda G, Lukwesa-musyani C, Samutela MT, Kim JH, Im J, et al. Policies and  
557 strategies to promote social equity in health. 2019; Available:  
558 <https://core.ac.uk/download/pdf/6472456.pdf>. Vol. 69, *Clinical Infectious Diseases.* 2019.



- 559 17. Marmot M, Allen J, Goldblatt P, Boyce T, McNeish D, Grady M, et al. Fair society, healthy  
560 lives (The Marmot Review): Strategic Review of Health Inequalities in English post-2010. The  
561 Marmot Review. 2010.
- 562 18. World Health Organization. A conceptual framework for action on the social determinants of  
563 health: debates, policy & practice, case studies. 2010; Available from:  
564 <https://apps.who.int/iris/handle/10665/44489>
- 565 19. Dahlgren G, Whitehead M. Policies and strategies to promote social equity in health. 1991.  
566 69.
- 567 20. Public Health England. Health profile for England: 2017. Chapter 6: social determinants of  
568 health. 2017.
- 569 21. McKeown R, Hagell A. Clarifying what we mean by health inequalities for young people.  
570 2021:16.
- 571 22. Hagell A, Shah R, People's Health Y, Viner R, Hargreaves D, Varnes L, et al. The social  
572 determinants of young people's health Identifying the key issues and assessing how young  
573 people are doing in the 2010s [Internet]. 2018. Available from:  
574 <https://www.health.org.uk/collection/FutureHealthInquiry>
- 575 23. Viner RM, Kinra S, Nicholls D, Cole T, Kessel A, Christie D, et al. Burden of child and  
576 adolescent obesity on health services in England. Arch Dis Child. 2018 Mar;103(3):247–54.
- 577 24. O’Dea B, Glozier N, Purcell R, McGorry PD, Scott J, Feilds KL, et al. A cross-sectional  
578 exploration of the clinical characteristics of disengaged (NEET) young people in primary  
579 mental healthcare. BMJ Open. 2014 Dec;4(12):e006378.
- 580 25. Fergusson DM, John Horwood L, Woodward LJ. Unemployment and psychosocial adjustment  
581 in young adults: causation or selection? Social Science & Medicine. 2001 Aug;53(3):305–20.
- 582 26. Jones Nielsen JD, Lavery AA, Millett C, Mainous III AG, Majeed A, Saxena S. Rising Obesity-  
583 Related Hospital Admissions among Children and Young People in England: National Time  
584 Trends Study. Zhang H, editor. PLoS ONE. 2013 Jun 12;8(6):e65764.

- 585 27. Viner RM, Ozer EM, Denny S, Marmot M, Resnick M, Fatusi A, et al. Adolescence and the  
586 social determinants of health. *The Lancet*. 2012 Apr;379(9826):1641–52.
- 587 28. Hatch SL, Frissa S, Verdecchia M, Stewart R, Fear NT, Reichenberg A, et al. Identifying socio-  
588 demographic and socioeconomic determinants of health inequalities in a diverse London  
589 community: the South East London Community Health (SELCoH) study. *BMC Public Health*.  
590 2011 Nov 11;11(1):861.
- 591 29. Hatch SL, Gazard B, Williams DR, Frissa S, Goodwin L, SELCoH Study Team, et al.  
592 Discrimination and common mental disorder among migrant and ethnic groups: findings  
593 from a South East London Community sample. *Social Psychiatry and Psychiatric  
594 Epidemiology*. 2016 May 1;51(5):689–701.
- 595 30. Carter JL, Strang J, Frissa S, Hayes RD, SELCoH Study Team, Hatch SL, et al. Comparisons of  
596 polydrug use at national and inner city levels in England: associations with demographic and  
597 socioeconomic factors. *Annals of Epidemiology*. 2013 Oct;23(10):636–45.
- 598 31. Kadra G, Dean K, Hotopf M, Hatch SL. Investigating Exposure to Violence and Mental Health  
599 in a Diverse Urban Community Sample: Data from the South East London Community Health  
600 (SELCoH) Survey. Seedat S, editor. *PLoS ONE*. 2014 Apr 1;9(4):e93660.
- 601 32. Gunasinghe C, Gazard B, Aschan L, MacCrimmon S, Hotopf M, Hatch SL. Debt, common  
602 mental disorders and mental health service use. *Journal of Mental Health*. 2018 Nov  
603 2;27(6):520–8.
- 604 33. Woodhead C, Gunasinghe C, Kenrick J, Genn DH. social welfare advice and health among  
605 young people: a scoping review. *Journal of Social Welfare and Family Law*. 2022 Jan  
606 2;44(1):103–23.
- 607 34. NHS England and NHS Improvement. Population Health and the Population Health  
608 Management Programme [Internet]. [cited 2022 Jun 23]. Available from:  
609 <https://www.england.nhs.uk/integratedcare/what-is-integrated-care/phm/>

- 610 35. National Health Service. The NHS Long Term Plan [Internet]. 2019 [cited 2022 Apr 11].  
611 Available from: [www.longtermplan.nhs.uk](http://www.longtermplan.nhs.uk)
- 612 36. van Gemert-Pijnen JE, Nijland N, van Limburg M, Ossebaard HC, Kelders SM, Eysenbach G, et  
613 al. A Holistic Framework to Improve the Uptake and Impact of eHealth Technologies. *J Med*  
614 *Internet Res.* 2011 Dec 13;13(4):e111.
- 615 37. Cu A, Meister S, Lefebvre B, Ridde V. Assessing healthcare access using the Levesque's  
616 conceptual framework— a scoping review. *Int J Equity Health.* 2021 Dec;20(1):116.
- 617 38. Levesque JF, Harris MF, Russell G. Patient-centred access to health care: conceptualising  
618 access at the interface of health systems and populations. *Int J Equity Health.* 2013;12(1):18.
- 619 39. Robards F, Kang M, Steinbeck K, Hawke C, Jan S, Sanci L, et al. Health care equity and access  
620 for marginalised young people: a longitudinal qualitative study exploring health system  
621 navigation in Australia. *Int J Equity Health.* 2019 Dec;18(1):41.
- 622 40. Bolton RN, Parasuraman A, Hoefnagels A, Migchels N, Kabadayi S, Gruber T, et al.  
623 Understanding Generation Y and their use of social media: a review and research agenda.  
624 Aksoy L, editor. *Journal of Service Management.* 2013 Jun 14;24(3):245–67.
- 625 41. Uhls YT, Ellison NB, Subrahmanyam K. Benefits and Costs of Social Media in Adolescence.  
626 *Pediatrics.* 2017 Nov 1;140(Supplement\_2):S67–70.
- 627 42. Liverpool S, Mota CP, Sales CMD, Čuš A, Carletto S, Hancheva C, et al. Engaging Children and  
628 Young People in Digital Mental Health Interventions: Systematic Review of Modes of  
629 Delivery, Facilitators, and Barriers. *J Med Internet Res.* 2020 Jun 23;22(6):e16317.
- 630 43. World Health Organisation. Young people and digital health interventions: working together  
631 to design better. 2020; Available from: <https://www.who.int/news/item/29-10-2020-young-people-and-digital-health-interventions-working-together-to-design-better>  
632 [people-and-digital-health-interventions-working-together-to-design-better](https://www.who.int/news/item/29-10-2020-young-people-and-digital-health-interventions-working-together-to-design-better)
- 633 44. Office of National Statistics. Population estimates by ethnic group and religion, England and  
634 Wales.

- 635 45. Kroenke K, Spitzer RL, Williams JB. The PHQ-9: validity of a brief depression severity  
636 measure. *J Gen Intern Med*. 2001 Sep;16(9):606–13.
- 637 46. Spitzer RL, Kroenke K, Williams JBW, Löwe B. A Brief Measure for Assessing Generalized  
638 Anxiety Disorder: The GAD-7. *Arch Intern Med*. 2006 May 22;166(10):1092.
- 639 47. Kroenke K, Spitzer RL, Williams JBW, Monahan PO, Löwe B. Anxiety Disorders in Primary  
640 Care: Prevalence, Impairment, Comorbidity, and Detection. *Ann Intern Med*. 2007 Mar  
641 6;146(5):317.
- 642 48. Kroenke K, Spitzer RL, Williams JBW. The PHQ-15: Validity of a New Measure for Evaluating  
643 the Severity of Somatic Symptoms: *Psychosomatic Medicine*. 2002 Mar;64(2):258–66.
- 644 49. National Co-ordinating Centre for Public Engagement. What is Public Engagement. 2017;  
645 Available from: [https://www.publicengagement.ac.uk/about-engagement/what-public-](https://www.publicengagement.ac.uk/about-engagement/what-public-engagement)  
646 [engagement](https://www.publicengagement.ac.uk/about-engagement/what-public-engagement).
- 647 50. National Institute for Health and Care Research. NIHR launches new Centre for Engagement  
648 and Dissemination. 2020; Available from: [https://www.nihr.ac.uk/news/nihr-launches-new-](https://www.nihr.ac.uk/news/nihr-launches-new-centre-for-engagement-and-dissemination/24576)  
649 [centre-for-engagement-and-dissemination/24576](https://www.nihr.ac.uk/news/nihr-launches-new-centre-for-engagement-and-dissemination/24576).
- 650 51. StataCorp LP. Stata data analysis and statistical Software. Edition Release. 2017.
- 651 52. Bryman A, G, Burgess R. Analyzing qualitative data. Edition Release. 2002.
- 652 53. Braun V, Clarke V. Thematic analysis. In: APA handbook of research methods in psychology,  
653 Vol 2: Research designs: Quantitative, qualitative, neuropsychological, and biological.  
654 Washington: American Psychological Association; 2012. p. 57–71.

Figure 1: Flow chart illustrating process of public and patient engagement and involvement

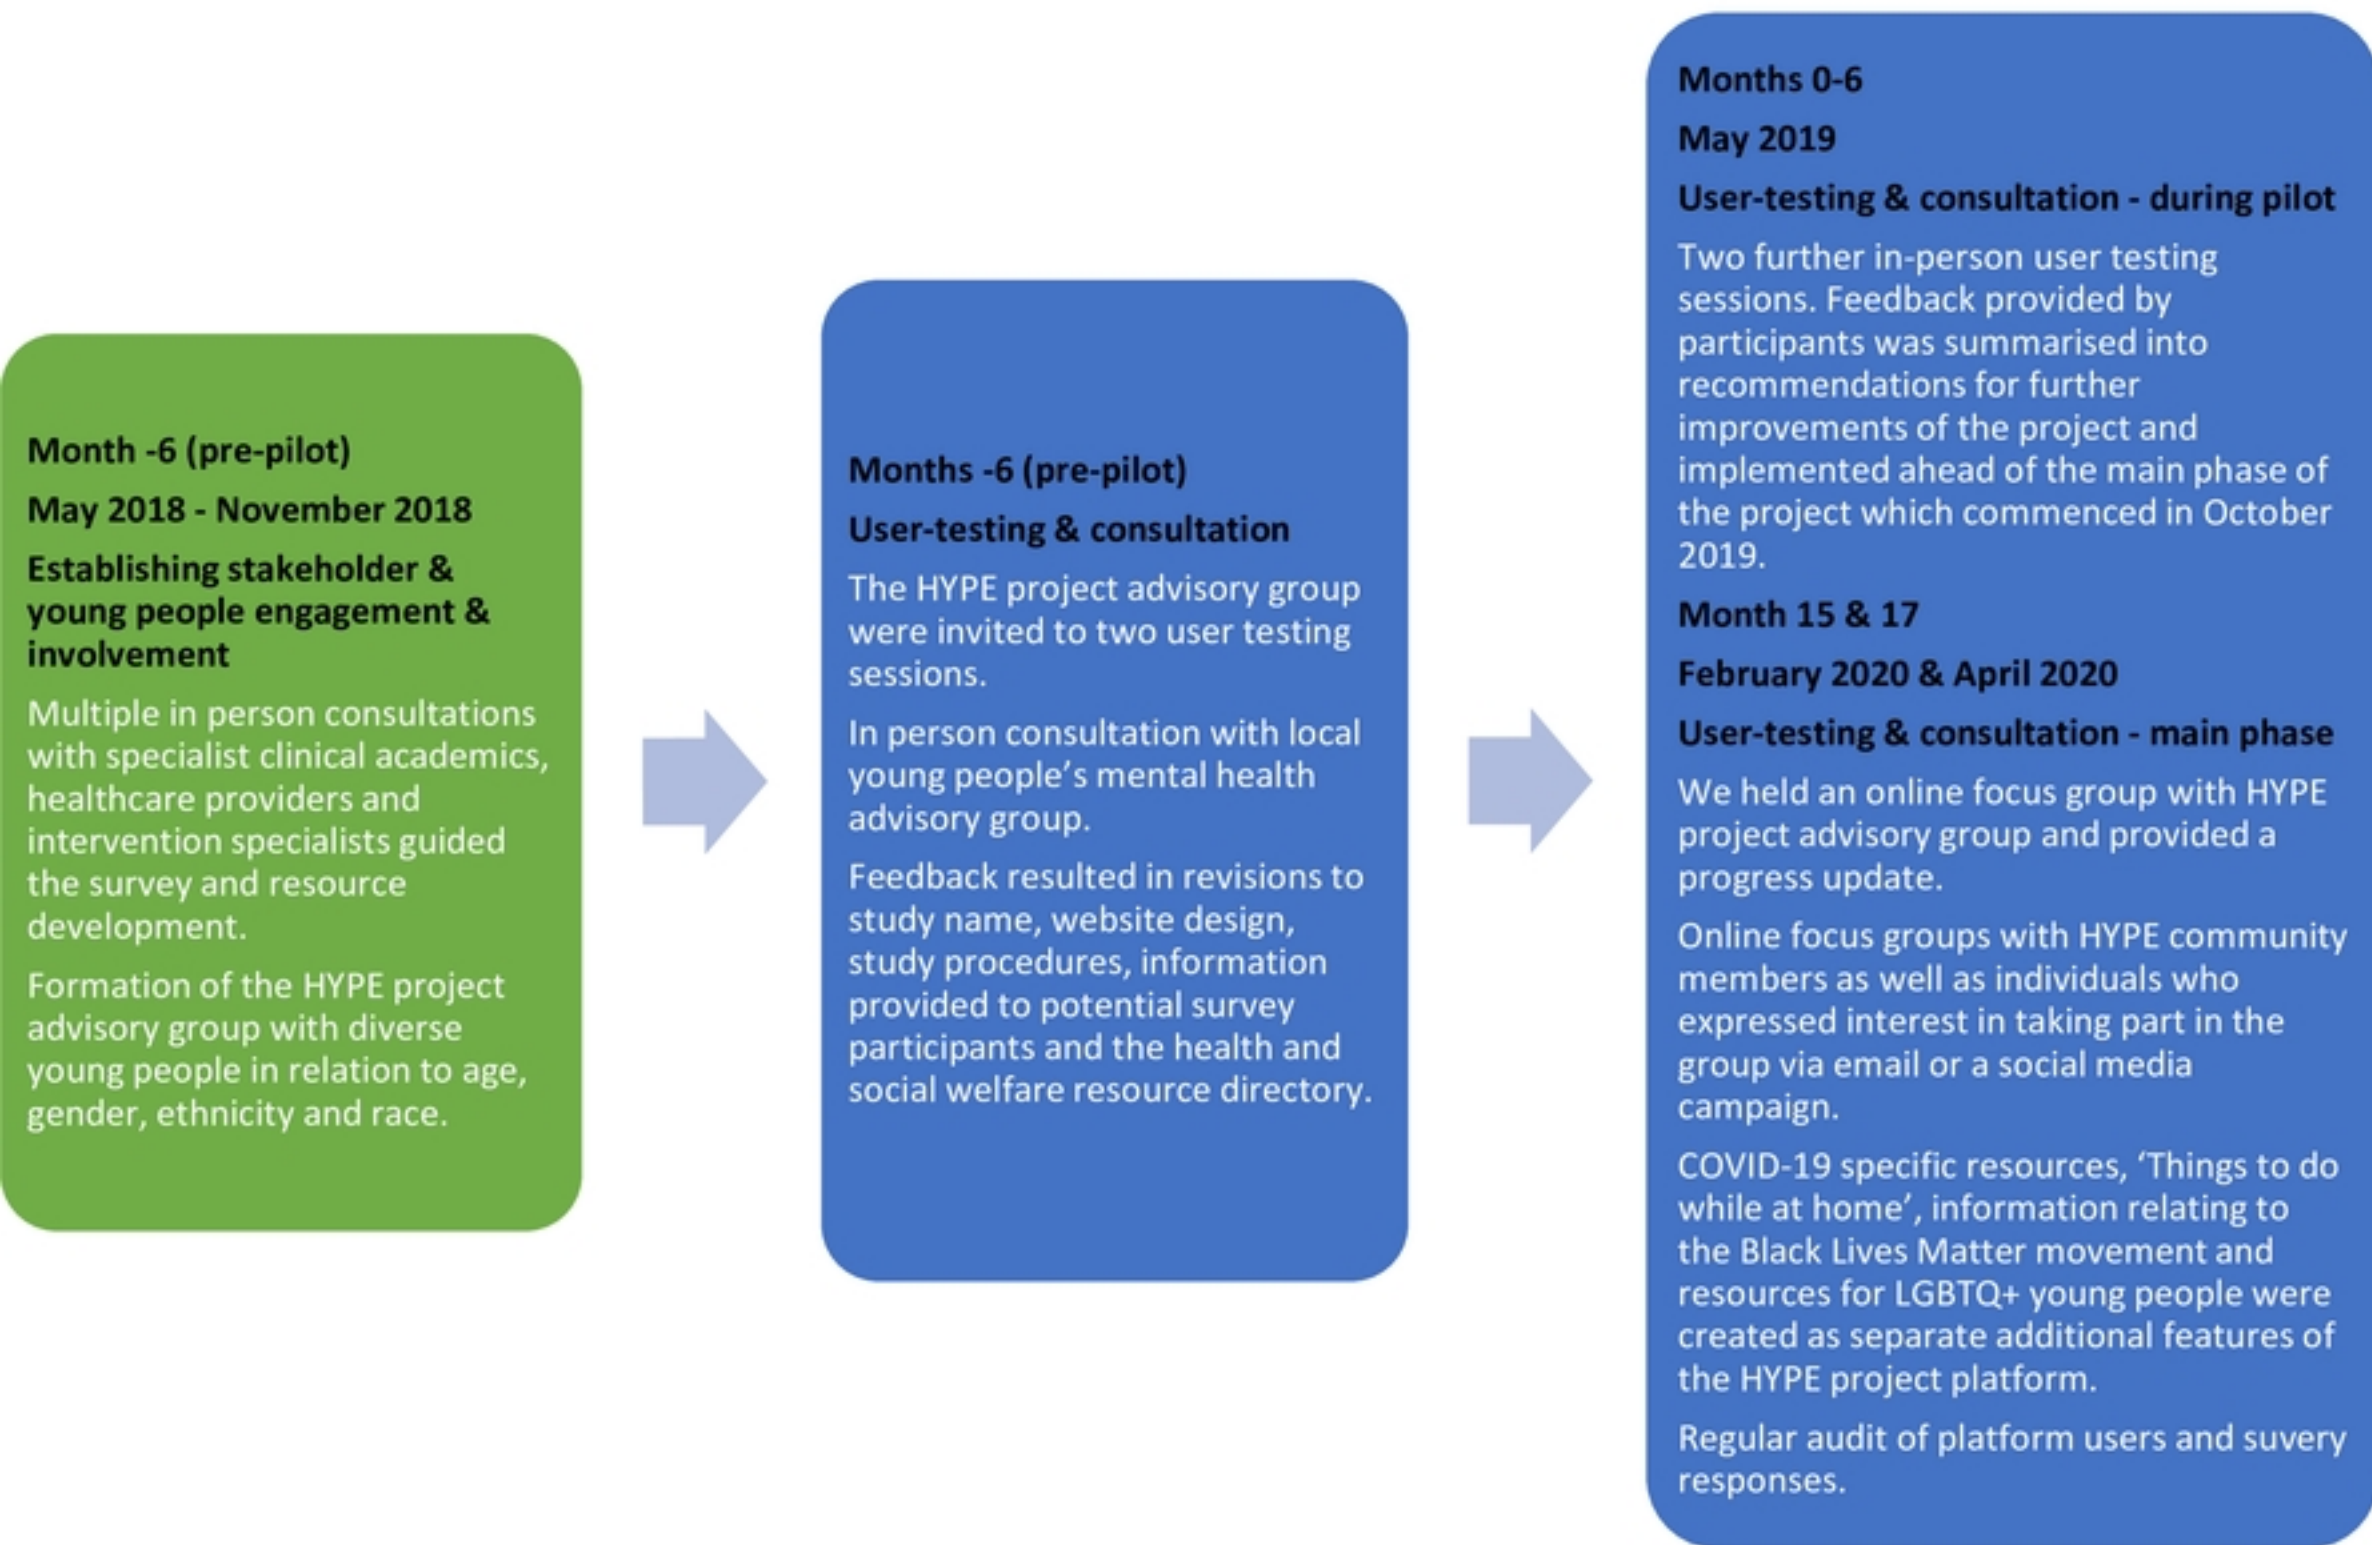

Figure 1



medRxiv preprint doi: <https://doi.org/10.1101/2022.11.03.22281895>; this version posted November 5, 2022. The copyright holder for this preprint (which was not certified by peer review) is the author/funder, who has granted medRxiv a license to display the preprint in perpetuity. It is made available under a [CC-BY 4.0 International license](https://creativecommons.org/licenses/by/4.0/).

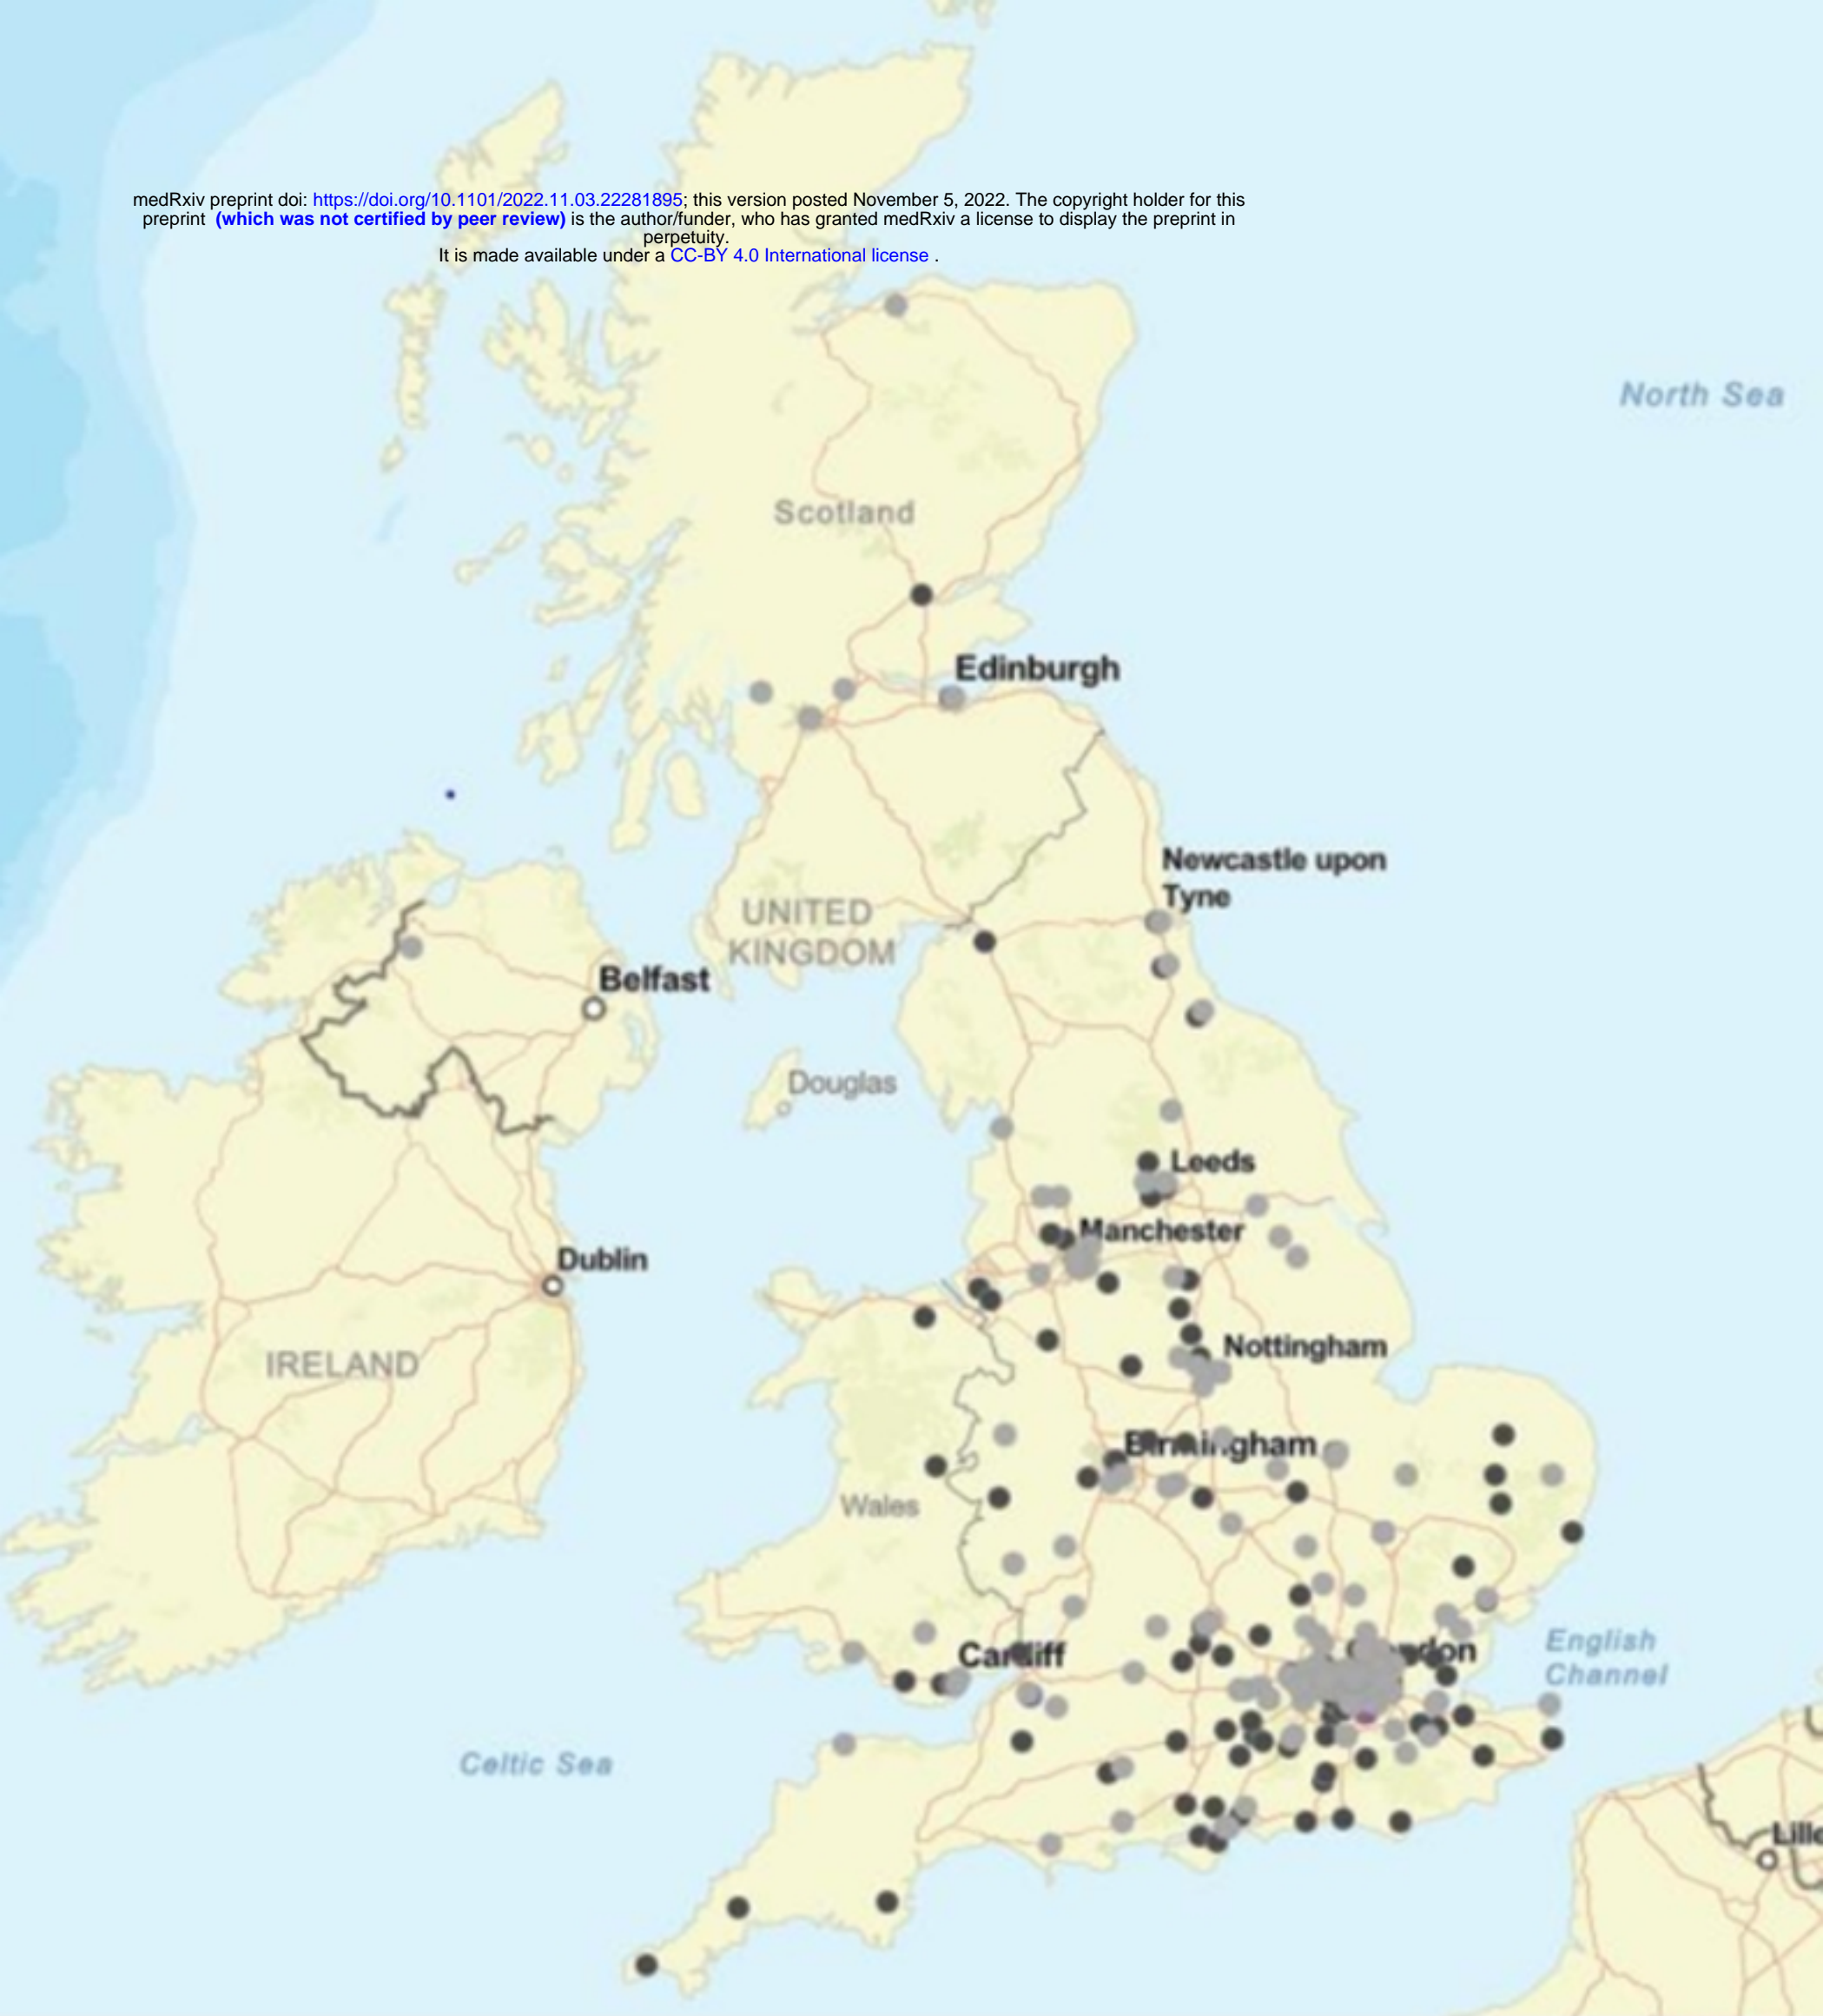

Figure 2

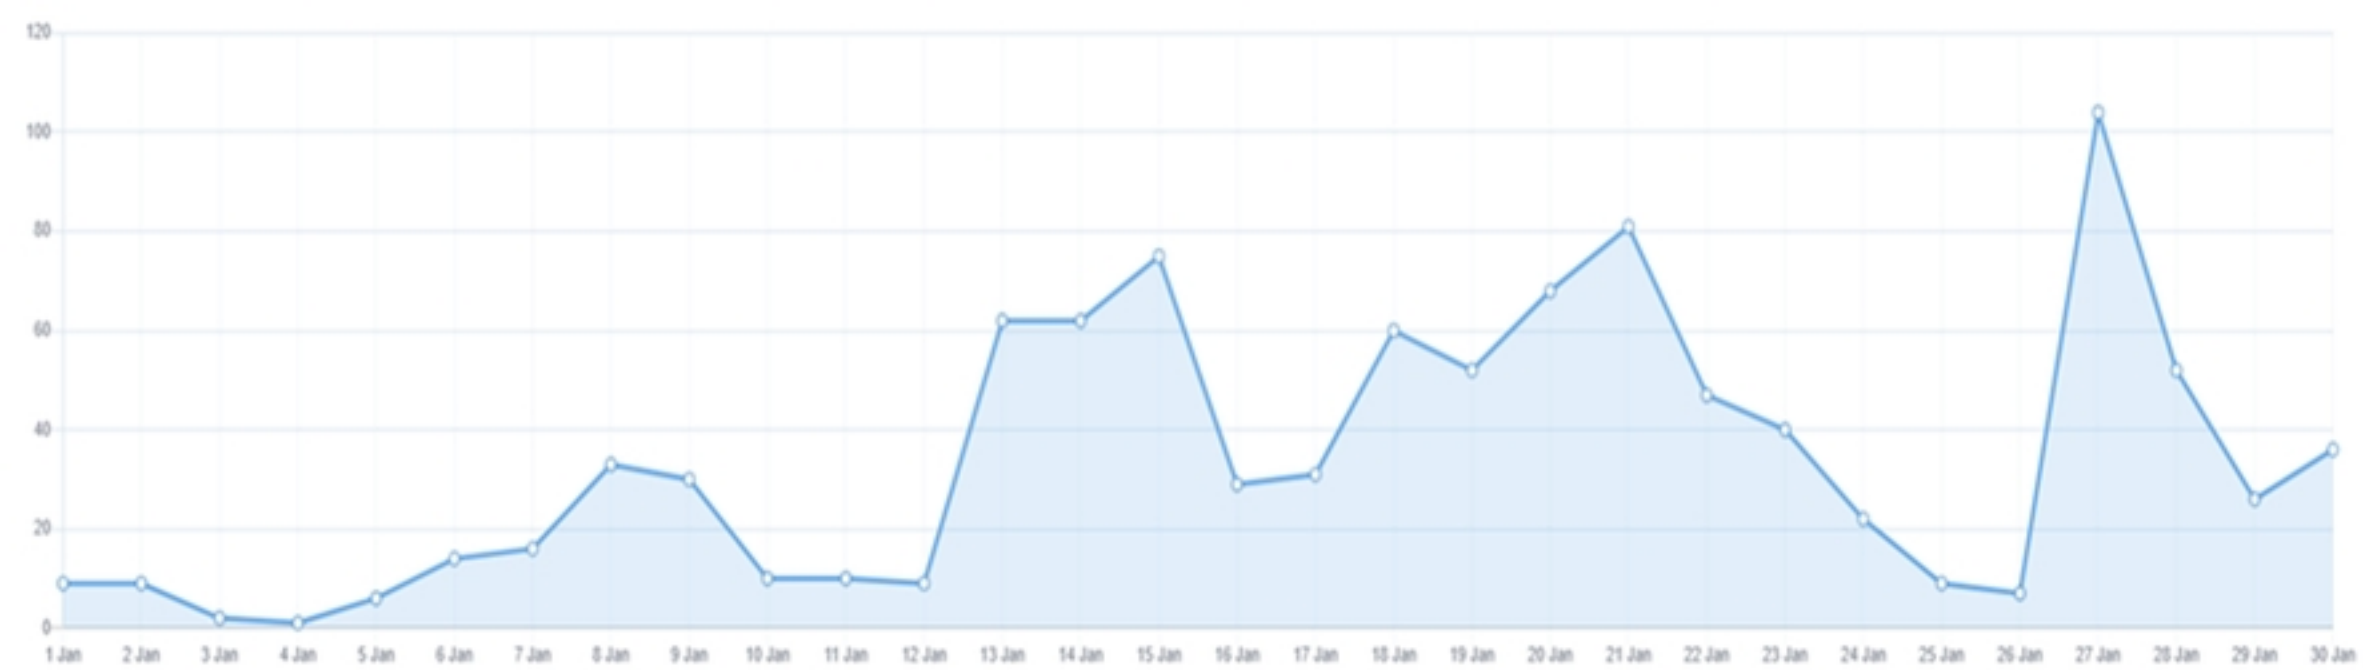

|                                                           |                                                            |                                                                          |                                                             |
|-----------------------------------------------------------|------------------------------------------------------------|--------------------------------------------------------------------------|-------------------------------------------------------------|
| <b>Sessions</b><br>1012<br>↑ 113%<br>vs. Previous 30 Days | <b>Pageviews</b><br>1885<br>↑ 109%<br>vs. Previous 30 Days | <b>Avg. Session Duration</b><br>1m 29s<br>↓ -13%<br>vs. Previous 30 Days | <b>Bounce Rate</b><br>58.7%<br>↑ 1%<br>vs. Previous 30 Days |
|-----------------------------------------------------------|------------------------------------------------------------|--------------------------------------------------------------------------|-------------------------------------------------------------|

Figure 3
